# Supplementary material for: INCB054828 (pemigatinib), a potent and selective inhibitor of fibroblast growth factor receptors 1, 2, and 3, displays activity against genetically defined tumor models
Source: PubMed Central journal article supplement (PMC7313537; doi:10.1371/journal.pone.0231877), 2020-04-21

## Supporting Information (S1 File)

**INCB054828 (pemigatinib), a potent and selective inhibitor of fibroblast growth factor receptors 1, 2, and 3, displays activity against genetically defined tumor models**

Phillip C.C. Liu<sup>1</sup>, Holly Koblish<sup>1\*</sup>, Liangxing Wu<sup>2</sup>, Kevin Bowman<sup>1</sup>, Sharon Diamond<sup>1</sup>, Darlise DiMatteo<sup>1</sup>, Yue Zhang<sup>1</sup>, Michael Hansbury<sup>1</sup>, Mark Rupar<sup>1</sup>, Xiaoming Wen<sup>1</sup>, Paul Collier<sup>1</sup>, Patricia Feldman<sup>1</sup>, Ronald Klabe<sup>1</sup>, Krista A. Burke<sup>1</sup>, Maxim Soloviev<sup>1</sup>, Christine Gardiner<sup>1</sup>, Xin He<sup>1</sup>, Alla Volgina<sup>1</sup>, Maryanne Covington<sup>1</sup>, Bruce Ruggeri<sup>1</sup>, Richard Wynn<sup>1</sup>, Timothy C. Burn<sup>1</sup>, Peggy Scherle<sup>1</sup>, Swamy Yeleswaram<sup>1</sup>, Wenqing Yao<sup>2</sup>, Reid Huber<sup>1</sup>, Gregory Hollis<sup>1</sup>

<sup>1</sup>Discovery Biology, Incyte Research Institute, Wilmington, Delaware, United States of America

<sup>2</sup>Discovery Chemistry, Incyte Research Institute, Wilmington, Delaware, United States of America

\*Corresponding author

Email: [hkoblish@incyte.com](mailto:hkoblish@incyte.com) (HK); <https://orcid.org/0000-0002-9745-3561>

# Original Western Blot Images

Blots were developed using enhanced chemiluminescence substrate Femto (Thermo Fisher, Waltham, MA; #34094) and imaged with the Azure Biosystems c300 (Dublin, CA).

**Figure 2 Panel A: KG1a (FGFR1OP2-FGFR1)**

**p-FGFR (Y653/Y654)**

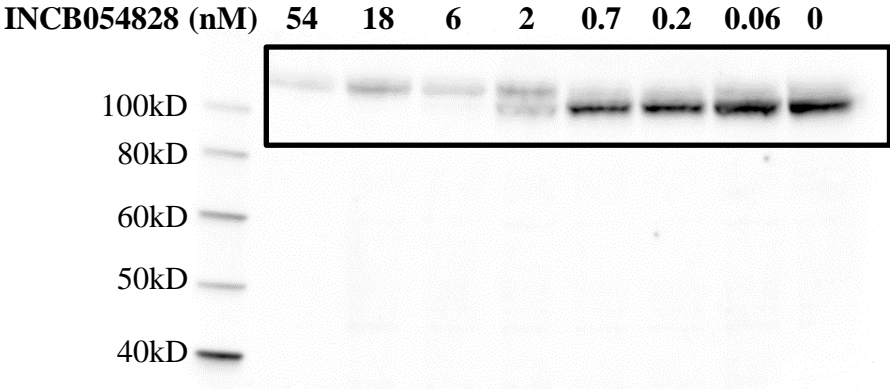

**FGFR1**

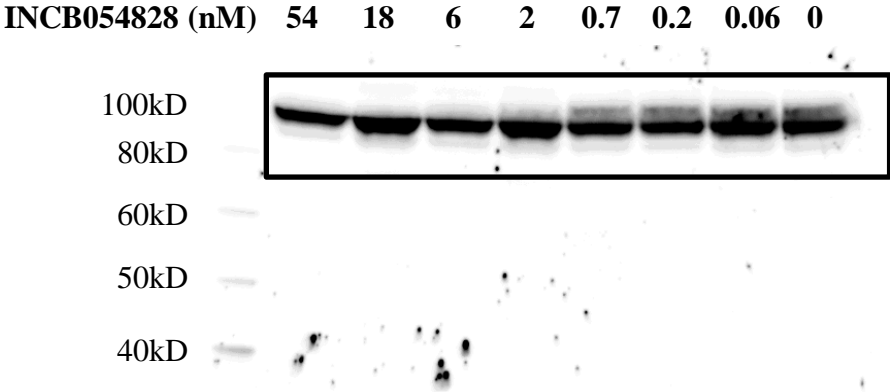

**p-ERK1/2 (T202/Y204)**

**INCB054828 (nM) 54 18 6 2 0.7 0.2 0.06 0**

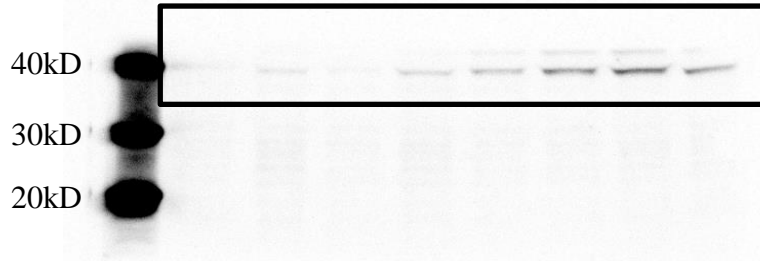

**ERK1/2**

**INCB054828 (nM) 54 18 6 2 0.7 0.2 0.06 0**

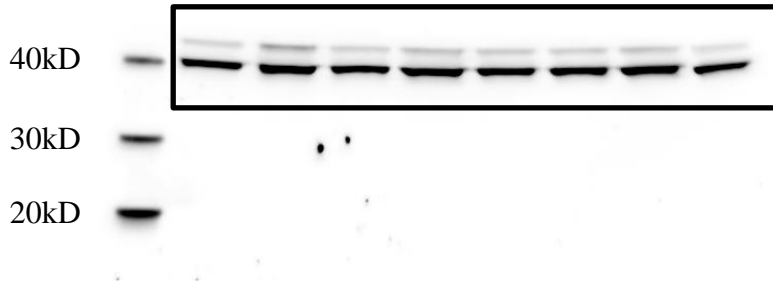

**p-STAT5 (Y694)**

**INCB054828 (nM) 54 18 6 2 0.7 0.2 0.06 0**

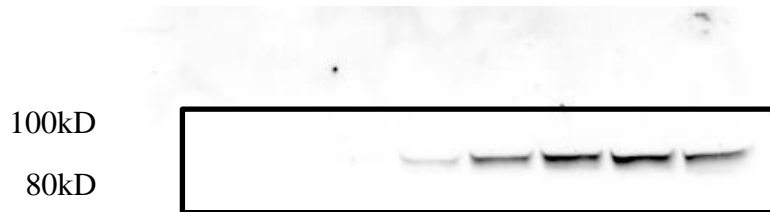



**Figure 2 Panel B: RT-4 (*FGFR3-TACC3*)**

**p-FRS2 (Y436)**

**INCB054828 (nM) 500 100 25 5 1.25 0.25 0 X**

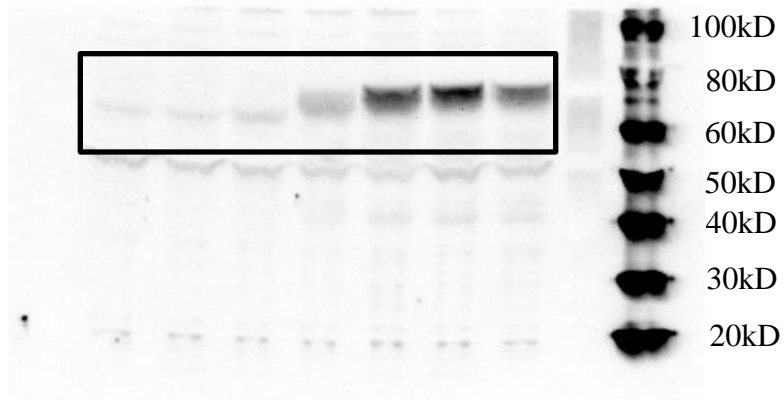

**FRS2**

**INCB054828 (nM) 500 100 25 5 1.25 0.25 0 X**

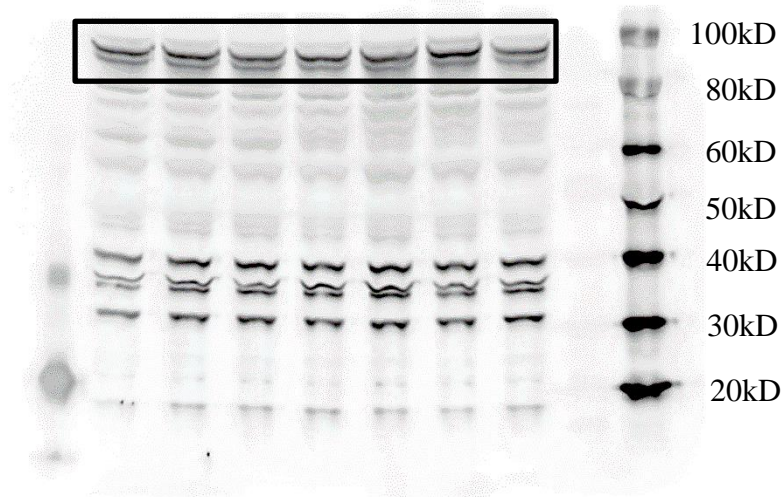

**p-ERK1/2 (T202/Y204)**

**INCB054828 (nM) 500 100 25 5 1.25 0.25 0 X**

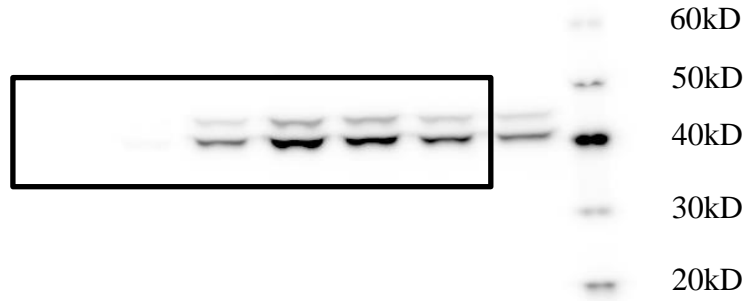

**ERK1/2**

**INCB054828 (nM) 500 100 25 5 1.25 0.25 0 X**

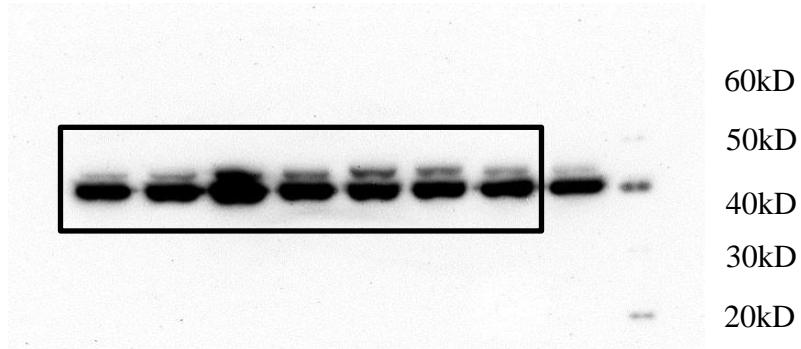

Supplement: pone.0231877.s002.pdf [file pone.0231877.s002.pdf]
